# Supplementary figures and images for: Mitogen activated protein kinases (MAPK) and protein phosphatases are involved in Aspergillus fumigatus adhesion and biofilm formation
Source: PubMed Central journal article supplement — Cell Surf. 2018 Mar 26;1:43–56. doi: 10.1016/j.tcsw.2018.03.002 (PMC7389341; doi:10.1016/j.tcsw.2018.03.002), 2018-03-26

# A.

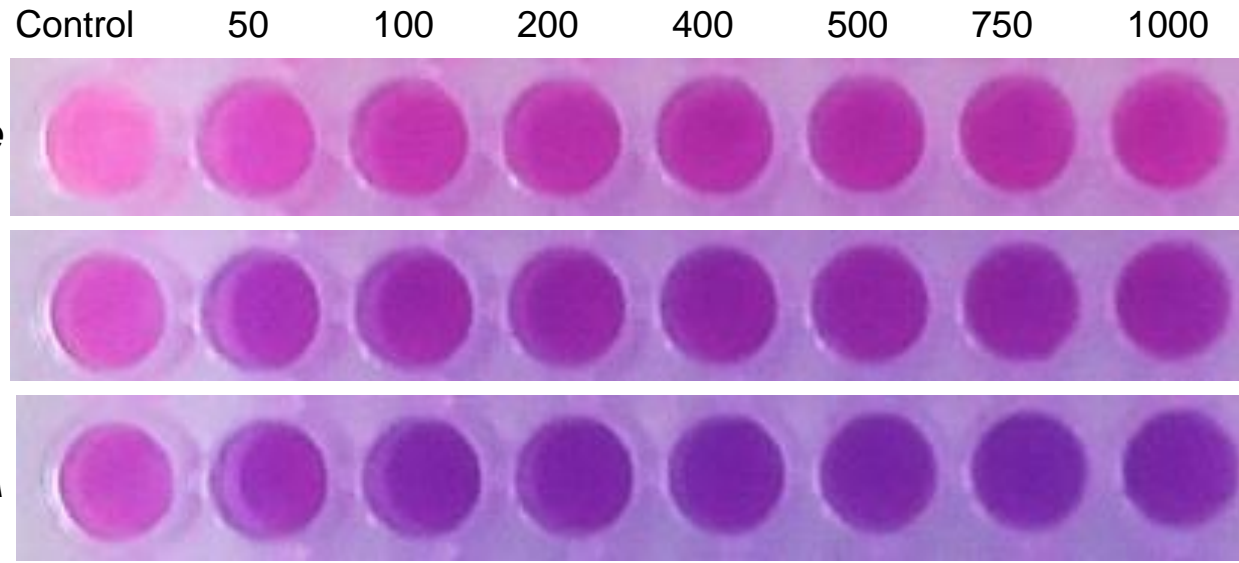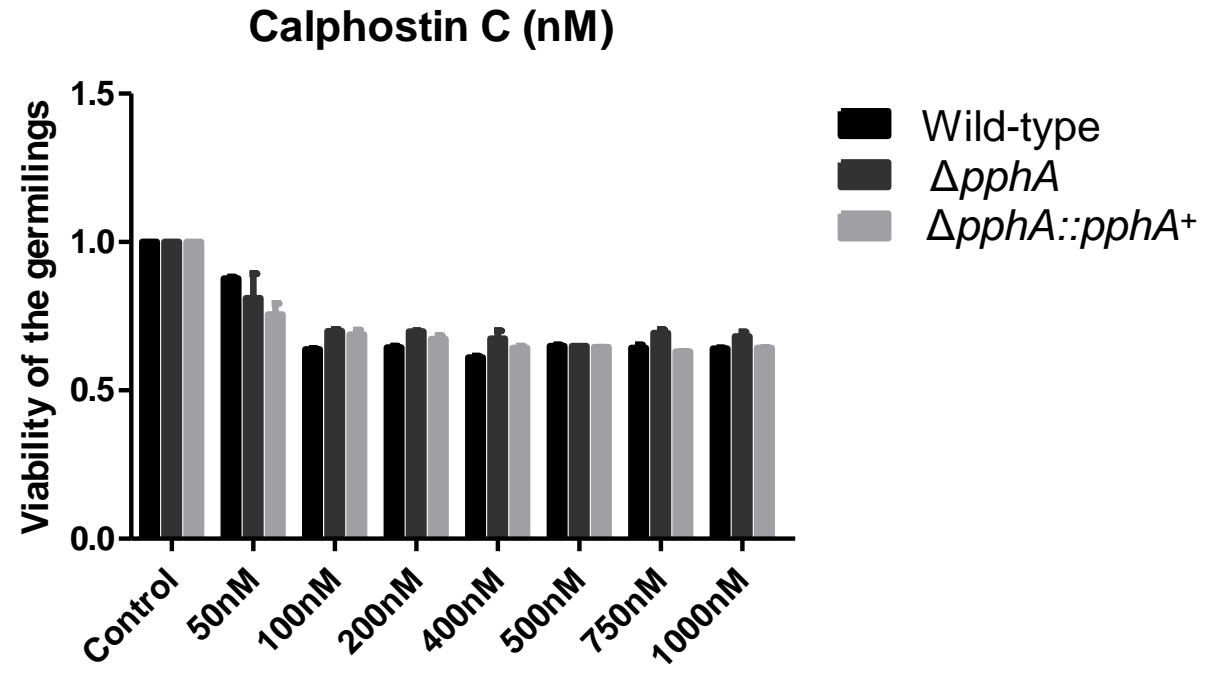

**B.**

Control    2,5    5    7,5    10    12,5    15    20

Cercosporamide  
Ug/mL*Wild type* $\Delta pphA$  $\Delta pphA::pphA$ 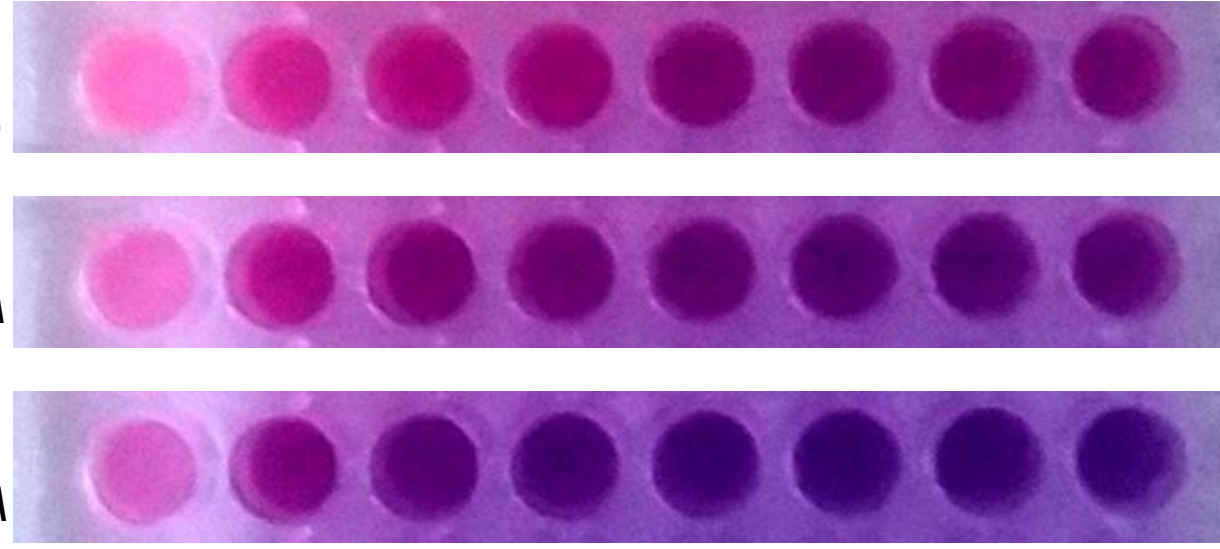

Cercosporamide (ug/mL)

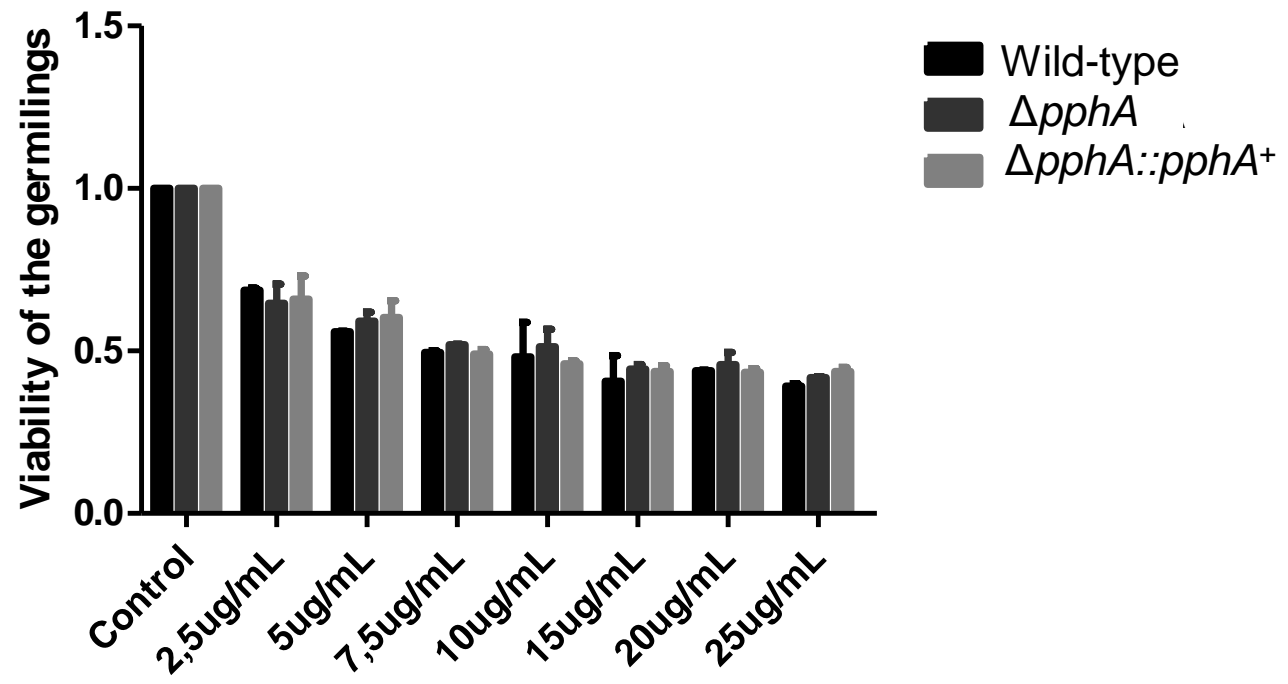

# C.

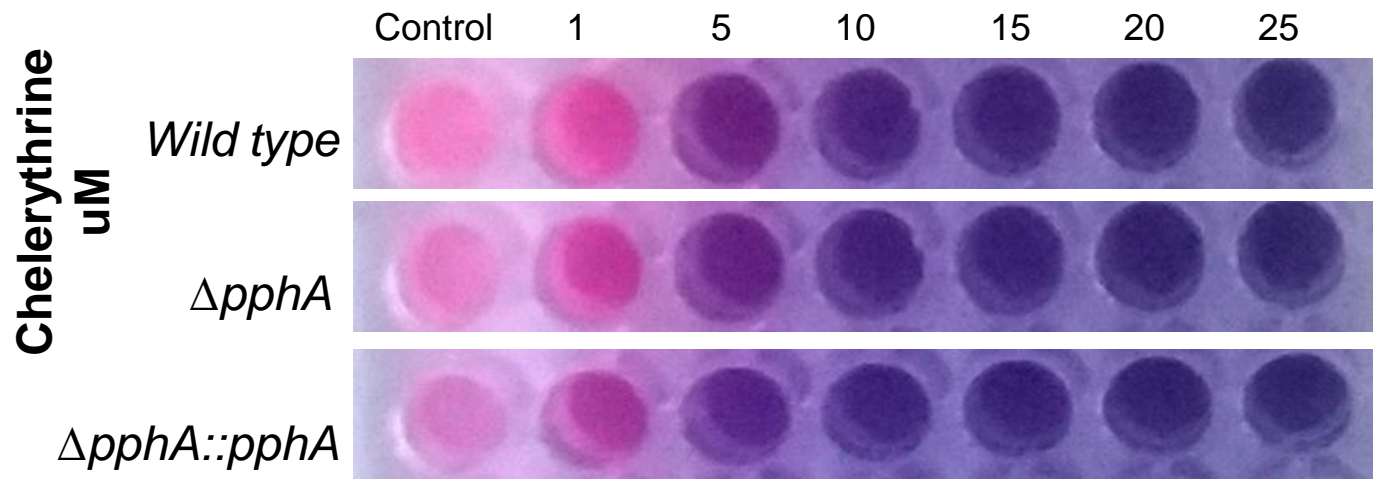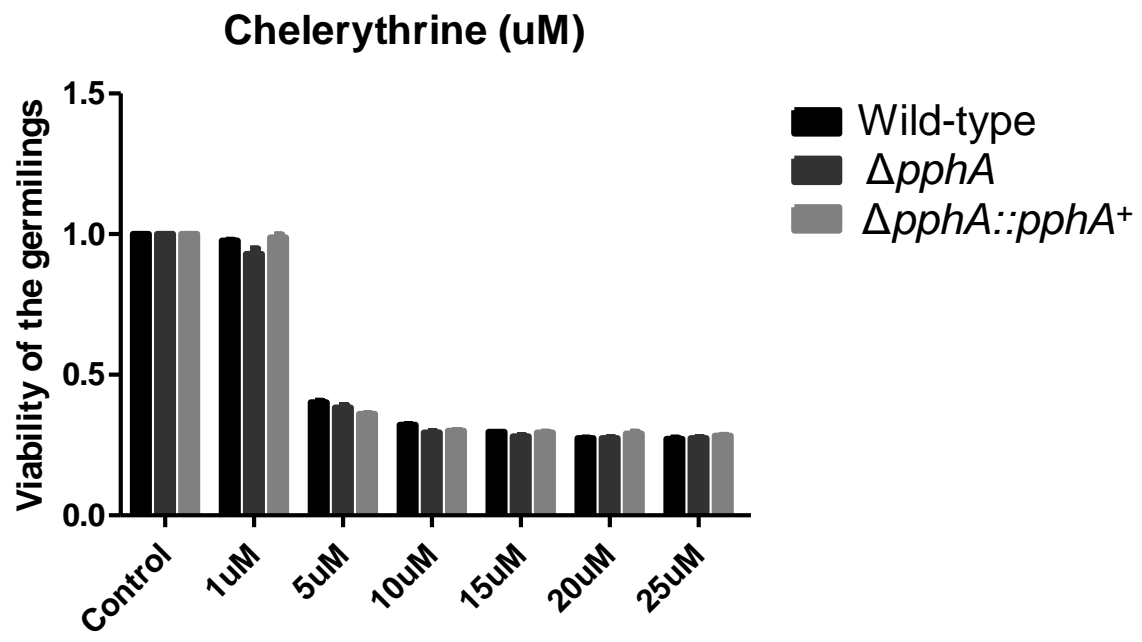

Supplement: mmc3.pdf [file mmc3.pdf]
